# Supplementary material
Source: publisher figshare collection journal article supplement (https://brill.figshare.com/articles/dataset/_/9601178)

# Protocol for natural selection analysis

Supplementary Material. Measuring natural selection on multivariate phenotypic traits. A protocol for verifiable and reproducible analyses of natural selection. Facundo Palacio, Mariano Ordano, and Santiago Benitez-Vieyra.

## Load packages and data

```
library(MVN)
library(car)
library(boot)
library(visreg)
library(ggplot2)
library(knitr)

data <- read.table("cyclop.txt", header = TRUE)
data <- na.omit(data)
attach(data)
```

## Step 1. Relative fitness and standardization of phenotypic traits (mean = 0, variance = 1)

```
W <- exported.pollinaria
wrel <- W/mean(W)
x1 <- flower.number
x2 <- nectary.depth
z1 <- (x1 - mean(x1))/sd(x1)
z2 <- (x2 - mean(x2))/sd(x2)
```

## Step 2. Testing multivariate normality of phenotypic traits

### 2.1. Histograms

```
ggplot(data = data, aes(x = z1)) + xlim(-2, 4) +  
  geom_histogram(aes(y = ..density..), col = "black",  
                 fill = "gray", binwidth = 0.5, alpha = 0.5) +  
  geom_density(col = "red", fill = "red", alpha = 0.3) + theme_classic()
```

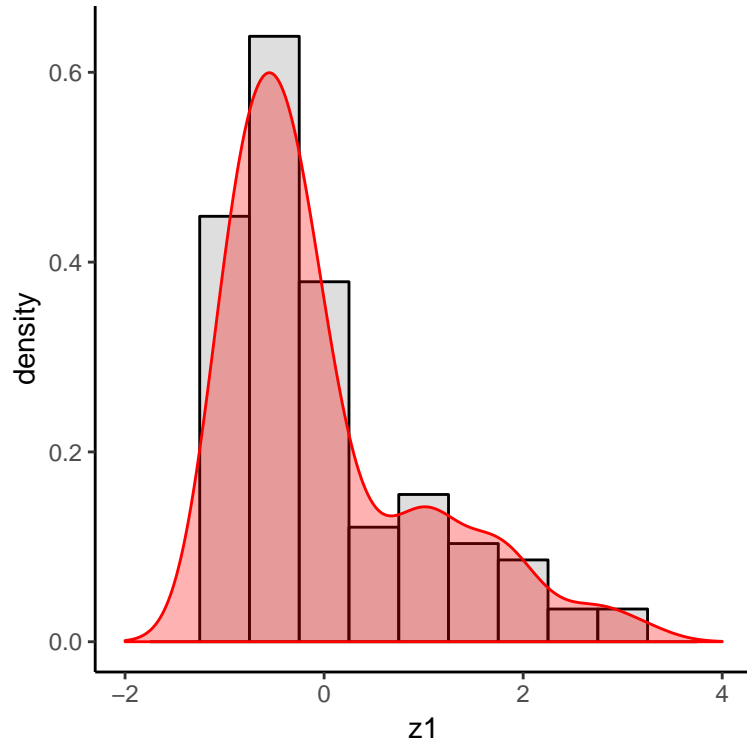

```
ggplot(data = data, aes(x = z2)) + xlim(-4, 4) +  
  geom_histogram(aes(y = ..density..), col = "black",  
                 fill = "gray", binwidth = 0.5, alpha = 0.5) +  
  geom_density(col = "red", fill = "red", alpha = 0.3) + theme_classic()
```

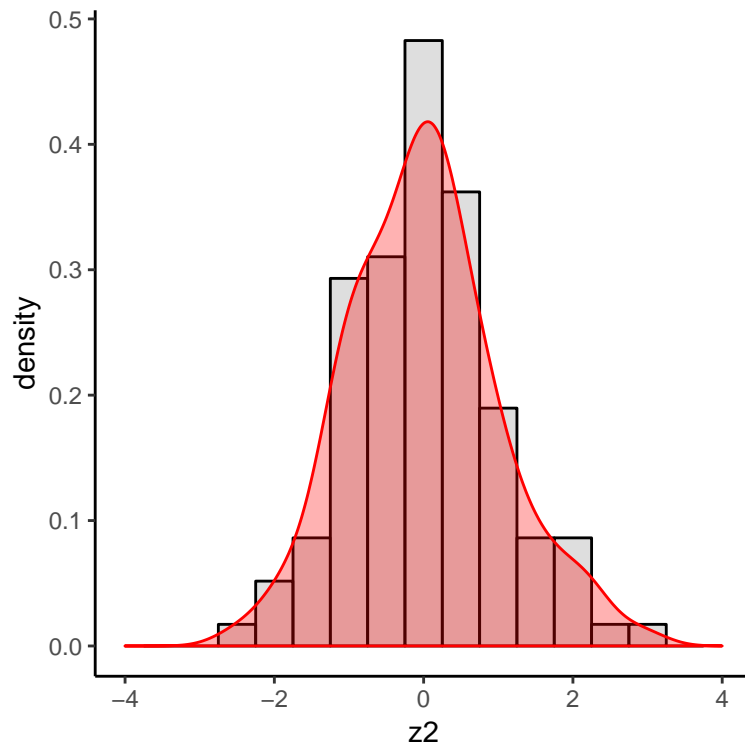

## 2.2. Multivariate normality tests

```
kable(mvn(data.frame(z1, z2), mvnTest = "hz")$multivariateNormality, digits = 3)
```

| Test          | HZ    | p value | MVN |
|---------------|-------|---------|-----|
| Henze-Zirkler | 3.482 | 0       | NO  |

```
kable(mvn(data.frame(z1, z2), mvnTest = "royston")$multivariateNormality, digits = 3)
```

| Test    | H      | p value | MVN |
|---------|--------|---------|-----|
| Royston | 34.789 | 0       | NO  |

### 2.3. Q-Q plots

```
qqnorm(z1, cex = 1.5, pch = 19, col = rgb(red = 0, green = 0, blue = 0, alpha = 0.3), main = "")  
qqline(z1, col = "red", lwd = 2)
```

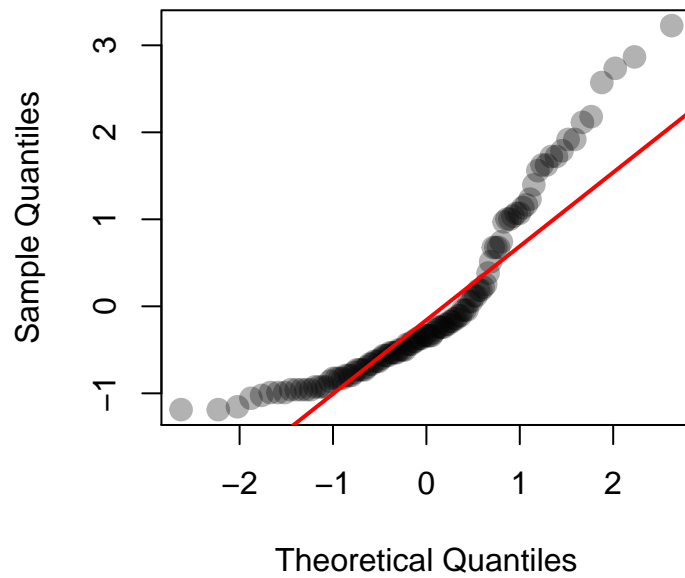

```
qqnorm(z2, cex = 1.5, pch = 19, col = rgb(red = 0, green = 0, blue = 0, alpha = 0.3), main = "")  
qqline(z2, col = "red", lwd = 2)
```

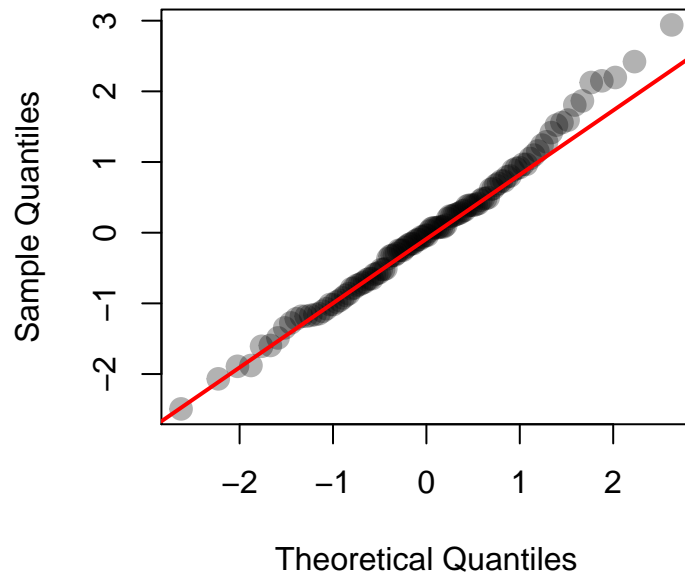

### Step 3. Assessing collinearity of phenotypic traits

#### 3.1. Pearson correlation between traits

```
cor(z1, z2)

## [1] 0.2101184
```

#### 3.2. Variance inflation factor on (linear) Lande and Arnold's model

```
lin.grad <- lm(wrel ~ z1 + z2)
nonlin.grad <- lm(wrel ~ z1 + z2 + I((1/2)*z1^2) + I((1/2)*z2^2) + z1:z2)
```

```
kable(vif(lin.grad), digits = 3)
```

|    | x     |
|----|-------|
| z1 | 1.046 |
| z2 | 1.046 |

```
kable(summary(lin.grad)$coeff, digits = 3)
```

|             | Estimate | Std. Error | t value | Pr(> t ) |
|-------------|----------|------------|---------|----------|
| (Intercept) | 1.000    | 0.038      | 26.409  | 0        |
| z1          | 0.652    | 0.039      | 16.752  | 0        |
| z2          | 0.198    | 0.039      | 5.082   | 0        |

```
kable(summary(nonlin.grad)$coeff, digits = 3)
```

|                 | Estimate | Std. Error | t value | Pr(> t ) |
|-----------------|----------|------------|---------|----------|
| (Intercept)     | 1.112    | 0.051      | 21.892  | 0.000    |
| z1              | 0.780    | 0.055      | 14.289  | 0.000    |
| z2              | 0.173    | 0.037      | 4.717   | 0.000    |
| I((1/2) * z1^2) | -0.200   | 0.064      | -3.109  | 0.002    |
| I((1/2) * z2^2) | -0.086   | 0.056      | -1.524  | 0.130    |
| z1:z2           | 0.143    | 0.038      | 3.822   | 0.000    |

### Step 4. Checking model residuals

#### 4.1. Shapiro test

```
shapiro.test(resid(lin.grad))

##
##  Shapiro-Wilk normality test
##
## data:  resid(lin.grad)
## W = 0.95743, p-value = 0.001003
```

```
shapiro.test(resid(nonlin.grad))

##
##  Shapiro-Wilk normality test
##
## data:  resid(nonlin.grad)
## W = 0.97573, p-value = 0.03342
```

#### 4.2. Q-Q plots

```
qqnorm(resid(lin.grad), cex = 1.5, pch = 19,
        col = rgb(red = 0, green = 0, blue = 0, alpha = 0.3), main = "")
qqline(resid(lin.grad), col = "red", lwd = 2)
```

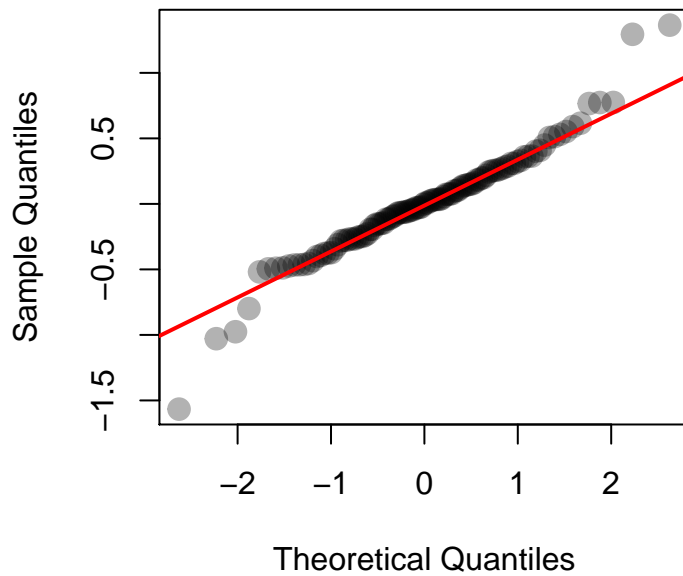

```
qqnorm(resid(nonlin.grad), cex = 1.5, pch = 19,
       col = rgb(red = 0, green = 0, blue = 0, alpha = 0.3), main = "")
qqline(resid(nonlin.grad), col = "red", lwd = 2)
```

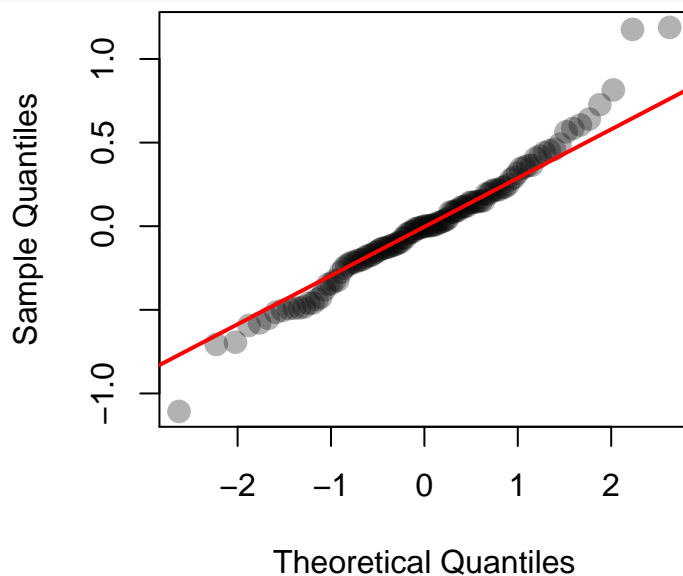

## Step 5. Standard error and confidence interval estimation

5.1. For the grad function, the data must have the relative fitness in the first column and standardized variables in the remaining columns. The function returns a vector with linear, quadratic and correlational gradients, and represents the input for the function boot.

```
grad <- function(data, original = c(1:nrow(data))) {
  data <- data[original, ]
  vars <- colnames(data)[-1]
  colnames(data)[1] <- "Wrel"
  model.lin <- as.formula(paste("Wrel", paste(vars, collapse=" + "), sep=" ~ "))
  m1 <- lm(formula = model.lin, data = data)
  part1 <- paste("(", paste(vars, collapse=" + "), ")^2", sep = "")
```

```

part2 <- paste("I(0.5*(", vars, "^2))", sep = "", collapse = " + ")
model.qua <- as.formula <- paste("Wrel", paste(part1, part2, sep = " + "), sep = " ~ ")
m2 <- lm(formula = model.qua, data = data)
sel.grad<-c(m1$coefficients[-1], m2$coefficients[-c(1:ncol(data))])
return(sel.grad)
}

newdata <- data.frame(wrel, z1, z2)
selection.gradients <- grad(data = newdata)
boot.grad <- boot(data = newdata, statistic = grad, R = 999)

```

5.2. Create a list with 95% bias-corrected bootstrap confidence intervals for each gradient.

```

CI <- list()
for(i in 1:length(boot.grad$t0)){
  CI[[i]] <- boot.ci(boot.grad, conf = 0.95, type = "bca", index = i)$bca[4:5]
}

names(CI) <- names(boot.grad$t0)
CI <- do.call(rbind, CI)
colnames(CI) <-c("lower.ci", "upper.ci")
kable(CI, digits = 3)

```

|                             | lower.ci | upper.ci |
|-----------------------------|----------|----------|
| z1                          | 0.505    | 0.777    |
| z2                          | 0.121    | 0.291    |
| I(0.5 * (z1 <sup>2</sup> )) | -0.354   | -0.043   |
| I(0.5 * (z2 <sup>2</sup> )) | -0.239   | 0.049    |
| z1:z2                       | 0.024    | 0.267    |

## Step 6. Plotting Lande & Arnold's model results

### 6.1. Linear selection

```
new.z1 <- seq(-4, 4, length = 500)
plot(z1, wrel, pch = 19, cex = 1.5, col = "gray70", ylab = "Relative fitness")
pred.z1 <- predict(lin.grad, newdata = data.frame(z1 = new.z1, z2 = mean(z2)))
lines(new.z1, pred.z1, lwd = 2, col = "blue")
```

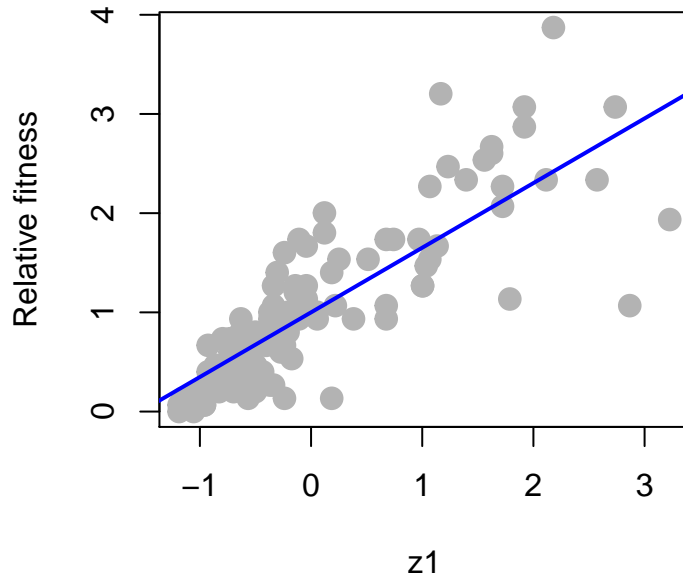

```
new.z2 <- seq(-4, 4, length = 500)
plot(z2, wrel, pch = 19, cex = 1.5, col = "gray70", ylab = "Relative fitness")
pred.z2 <- predict(lin.grad, newdata = data.frame(z1 = mean(z1), z2 = new.z2))
lines(new.z2, pred.z2, lwd = 2, col = "blue")
```

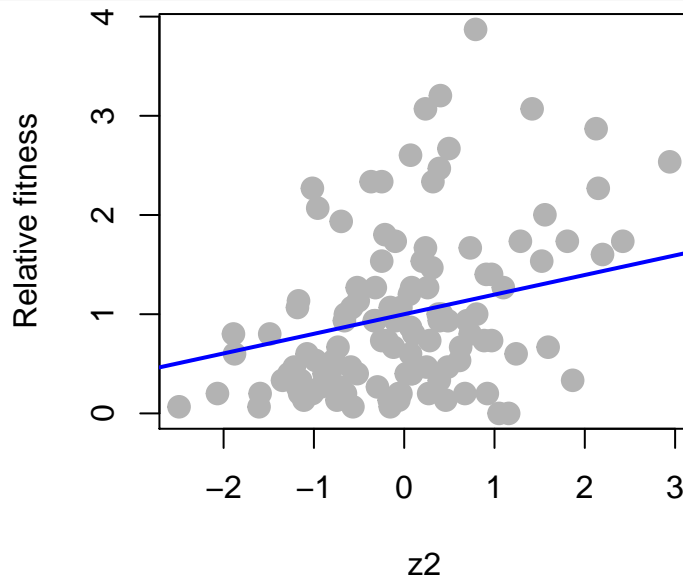



### 6.3. Quadratic selection

```
new.z1 <- seq(-4, 4, length = 500)
plot(z1, wrel, pch = 19, cex = 1.5, col = "gray70", ylab = "Relative fitness")
pred.z1 <- predict(nonlin.grad, newdata = data.frame(z1 = new.z1, z2 = mean(z2)))
lines(new.z1, pred.z1, lwd = 2, col = "blue")
```

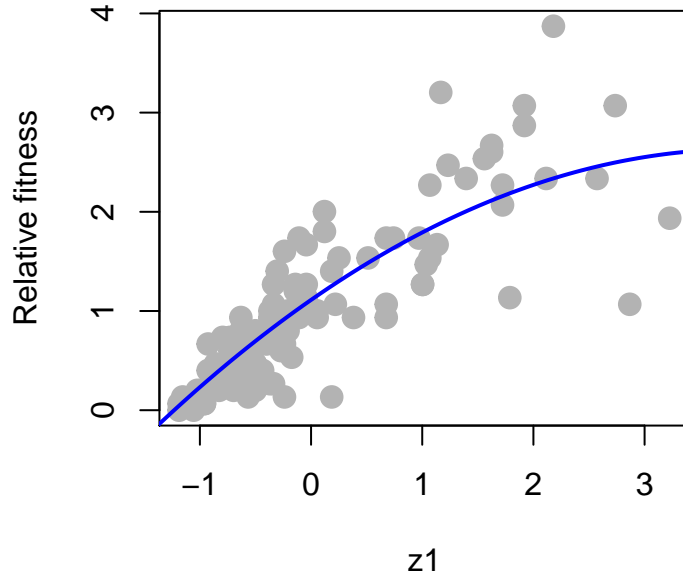

```
new.z2 <- seq(-4, 4, length = 500)
plot(z2, wrel, pch = 19, cex = 1.5, col = "gray70", ylab = "Relative fitness")
pred.z2 <- predict(nonlin.grad, newdata = data.frame(z1 = mean(z1), z2 = new.z2))
lines(new.z2, pred.z2, lwd = 2, col = "blue")
```

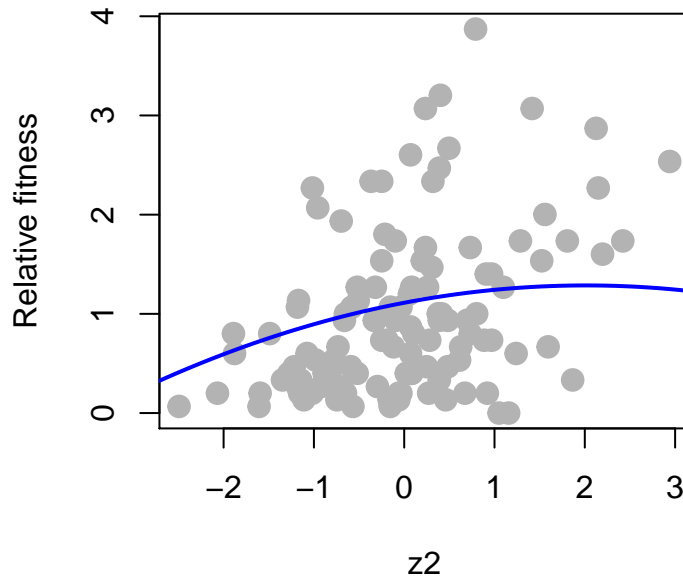

#### 6.4. Correlational selection

```
visreg2d(fit = nonlin.grad, xvar = "z1", yvar = "z2", scale = "response", plot.type = "image")
```

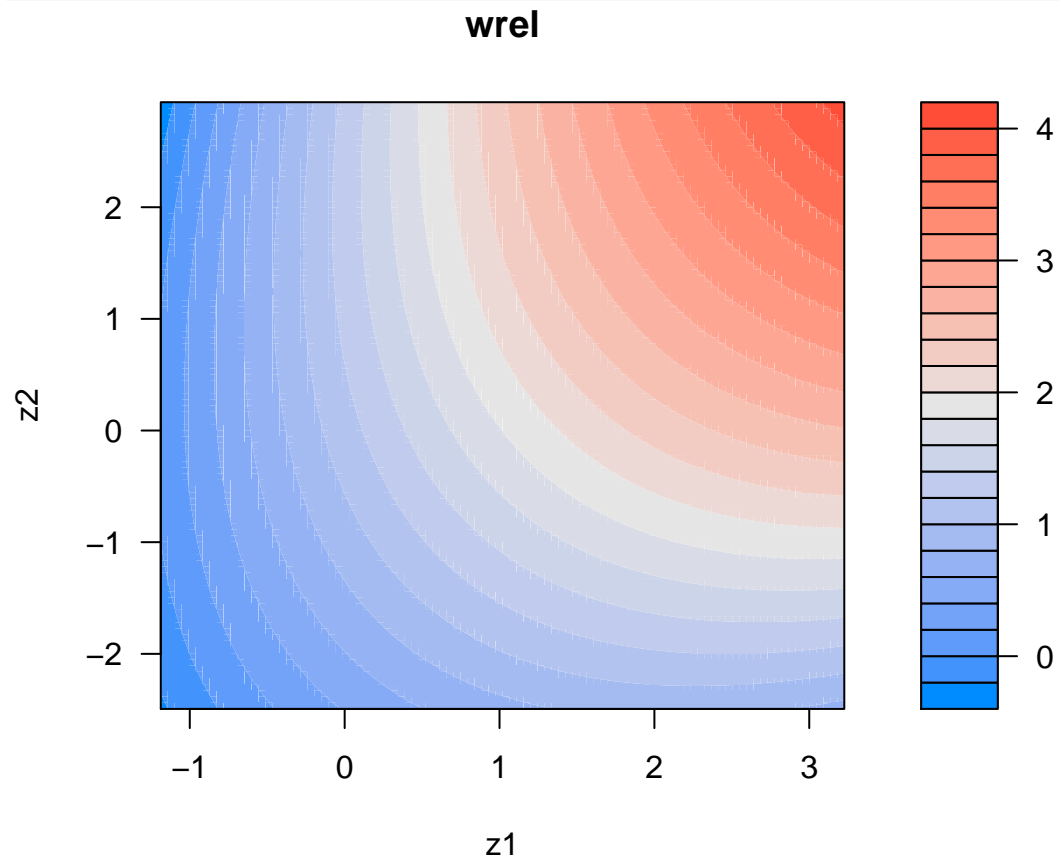

Supplement: Supplementary file 3 [file 1]
