# Supplementary material
Source: publisher figshare collection journal article supplement (https://brill.figshare.com/articles/dataset/_/9601178)
Supplement: Supplementary file 1 [file 1]

# **Measuring natural selection on multivariate phenotypic traits: a protocol for verifiable and reproducible analyses of natural selection**

Facundo Xavier Palacio<sup>a,\*</sup>, Mariano Ordano<sup>b</sup> and Santiago Benitez-Vieyra<sup>c</sup>

<sup>a</sup>Sección Ornitología, División Zoología Vertebrados, Facultad de Ciencias Naturales y Museo, and Consejo Nacional de Investigaciones Científicas y Técnicas, Paseo del Bosque s/n (B1900FWA), La Plata, Buenos Aires, Argentina

<sup>b</sup>Unidad Ejecutora Lillo, Fundación Miguel Lillo, and Consejo Nacional de Investigaciones Científicas y Técnicas, Miguel Lillo 251 (T4000JFE), San Miguel de Tucumán, Tucumán, Argentina

<sup>c</sup>Laboratorio de Ecología Evolutiva y Biología Floral, Instituto Multidisciplinario de Biología Vegetal, Consejo Nacional de Investigaciones Científicas y Técnicas, and Universidad Nacional de Córdoba, Av. Vélez Sársfield 1611 (X5016GCA), Córdoba, Argentina

\*Corresponding author. E-mail: facundo\_palacio@fcnym.unlp.edu.ar

## **Supplementary material**
